# Supplementary material for: Differential Responses of Eelgrass and Macroalgae in Pacific Northwest Estuaries Following an Unprecedented NE Pacific Ocean Marine Heatwave
Source: Frontiers journal article supplement (doi:10.3389/fmars.2022.838967), 2022-04-01
Supplement: Data_Sheet_1.pdf [file Data_Sheet_1.pdf]

## **Appendix A**

Differential responses of eelgrass and macroalgae in Pacific Northwest estuaries following an unprecedented NE Pacific Ocean marine heatwave

Caitlin L. Magel<sup>1\*</sup>, Francis Chan<sup>1</sup>, Margot Hessing-Lewis<sup>2</sup>, and Sally D. Hacker<sup>1</sup>

<sup>1</sup> Department of Integrative Biology, Oregon State University, Corvallis, Oregon, USA

<sup>2</sup> Hakai Institute, British Columbia, Canada

\* Corresponding author: Caitlin L. Magel, [magelcai@uw.edu](mailto:magelcai@uw.edu), current address: Puget Sound Institute, University of Washington Tacoma, Tacoma, Washington, USA

Table S1. Physiographic characteristics of the four study estuaries (Figure 1) located on the Pacific Northwest coast of the US, including Willapa Bay (46.69 °N, 124.08 °W), Washington, and Netarts Bay (45.44 °N, 123.96 °W), Coos Bay (45.44 °N, 123.96 °W), and Yaquina Bay (44.62 °N, 124.07 °W), Oregon. Variable abbreviations used in the Partial Least Squares Regression radar plots are in italics below the factors included in that analysis. Population estimates for 2010 were obtained from the U.S. Census Bureau for Pacific (Willapa Bay), Tillamook (Netarts Bay), Lincoln (Yaquina Bay), and Coos (Coos Bay) counties. County population density (people per km<sup>2</sup>) was multiplied by the watershed area (km<sup>2</sup>) and then divided by the estuary area (km<sup>2</sup>) to estimate population normalized to estuary area for each watershed.

| <b>Estuary</b> | <b>Normalized Human Population</b><br>(number per estuary area km <sup>-2</sup> ) | <b>Total freshwater nitrogen load per estuary area</b><br>(kg km <sup>-2</sup> yr <sup>-1</sup> ) <sup>†</sup> | <b>Total freshwater phosphorus load per estuary area</b><br>(kg km <sup>-2</sup> yr <sup>-1</sup> ) <sup>†</sup> | <b>Catchment (km<sup>2</sup>) per estuary area</b><br>(km <sup>2</sup> ) <sup>†</sup> | <b>Tidal Volume per day (m<sup>3</sup> d<sup>-1</sup>)<sup>†</sup></b><br><i>VolExch</i> | <b>Freshwater inflow (volume normalized)*</b><br><i>FWFlow</i> |
|----------------|-----------------------------------------------------------------------------------|----------------------------------------------------------------------------------------------------------------|------------------------------------------------------------------------------------------------------------------|---------------------------------------------------------------------------------------|------------------------------------------------------------------------------------------|----------------------------------------------------------------|
| Willapa Bay    | 66.03                                                                             | 10 x 10 <sup>6</sup>                                                                                           | 14 x 10 <sup>4</sup>                                                                                             | 6.8                                                                                   | 161.9 x 10 <sup>7</sup>                                                                  | 6.0                                                            |
| Netarts Bay    | 42.12                                                                             | 9.3 x 10 <sup>6</sup>                                                                                          | 9.3 x 10 <sup>4</sup>                                                                                            | 3.1                                                                                   | 3.0 x 10 <sup>7</sup>                                                                    | 8.0                                                            |
| Yaquina Bay    | 641.66                                                                            | 75 x 10 <sup>6</sup>                                                                                           | 130 x 10 <sup>4</sup>                                                                                            | 45.3                                                                                  | 5.1 x 10 <sup>7</sup>                                                                    | 42.0                                                           |
| Coos Bay       | 447.65                                                                            | 99 x 10 <sup>6</sup>                                                                                           | 180 x 10 <sup>4</sup>                                                                                            | 33.6                                                                                  | 14.0 x 10 <sup>7</sup>                                                                   | 14.0                                                           |

Data sources: <sup>†</sup>Hessing-Lewis and Hacker 2013; \*Lee and Brown 2009

Table S2. Summary of annual (July or August) macrophyte (eelgrass, macroalgae, and epiphyte) data and other estuary and ocean environmental factors compiled for the four US Pacific Northwest estuaries (Figure 1; Willapa Bay, WA, Netarts Bay, OR, Yaquina Bay, OR, and Coos Bay, OR) from 2006-2010 and 2015-2019. Data sources are given in Appendix A: Table S3. Italicized values indicate missing data that were imputed with an estuary-specific average. Abbreviations for factors used in the Partial Least Squares Regression radar plots are given in italics below each factor title.

|         |      | Macrophyte Biomass                                  |                                                   |                                         | Estuary Conditions     |                                                          |                 | Ocean Conditions                           |                                               |                                                                       |
|---------|------|-----------------------------------------------------|---------------------------------------------------|-----------------------------------------|------------------------|----------------------------------------------------------|-----------------|--------------------------------------------|-----------------------------------------------|-----------------------------------------------------------------------|
|         |      | Macroalgae biomass (g dry wt 0.25 m <sup>-2</sup> ) | Eelgrass biomass (g dry wt 0.25 m <sup>-2</sup> ) | Epiphyte load (g dry wt per g eelgrass) | Water Temperature (°C) | Estuarine Heat Wave Cumulative Intensity (°C x days) EHW | Salinity        | Offshore Current (cm s <sup>-1</sup> west) | Alongshore Current (cm s <sup>-1</sup> south) | Upwelling Index (m <sup>3</sup> s <sup>-1</sup> 100 m <sup>-1</sup> ) |
| Estuary | Year | <i>macroalgae</i>                                   | <i>eelgrass</i>                                   | <i>epiphyte</i>                         | <i>Water Temp</i>      |                                                          | <i>Salinity</i> | <i>Offshore</i>                            | <i>Alongshore</i>                             | <i>Upwelling</i>                                                      |
| Willapa | 2007 | 0.41                                                | 61.19                                             | 0.03                                    | 18.30                  | 103.0                                                    | 28.43           | -0.493                                     | 9.390                                         | 18                                                                    |
| Willapa | 2008 | 1.96                                                | 51.54                                             | 0.03                                    | 14.40                  | 0                                                        | 28.43           | 3.276                                      | 15.048                                        | 28.7                                                                  |
| Willapa | 2009 | 7.49                                                | 41.57                                             | 0.03                                    | 15.70                  | 0                                                        | 28.43           | 3.888                                      | 12.802                                        | 22.9                                                                  |
| Willapa | 2010 | 4.30                                                | 42.10                                             | 0.03                                    | 14.60                  | 0                                                        | 28.43           | 6.402                                      | 16.316                                        | 20.9                                                                  |
| Willapa | 2016 | 0.11                                                | 31.48                                             | 0.01                                    | 16.40                  | 116.8                                                    | 28.8            | 6.910                                      | 16.334                                        | 28.7                                                                  |
| Willapa | 2017 | 0.20                                                | 27.57                                             | 0.06                                    | 15.70                  | 0                                                        | 26.8            | 5.696                                      | 16.990                                        | 32                                                                    |
| Willapa | 2018 | 6.54                                                | 18.65                                             | 0.01                                    | 15.90                  | 0                                                        | 28.6            | 0.831                                      | 11.446                                        | 24.4                                                                  |
| Willapa | 2019 | 3.43                                                | 16.12                                             | 0.03                                    | 16.60                  | 23.3                                                     | 29.5            | 1.105                                      | 14.513                                        | 25                                                                    |
| Netarts | 2006 | 1.70                                                | 58.70                                             | 0.19                                    | 13.30                  | 0                                                        | 32.4            | 5.625                                      | 21.143                                        | 57.6                                                                  |
| Netarts | 2008 | 0.70                                                | 53.30                                             | 0.19                                    | 12.40                  | 0                                                        | 32.4            | 6.198                                      | 22.359                                        | 41.4                                                                  |
| Netarts | 2010 | 1.10                                                | 40.10                                             | 0.19                                    | 12.50                  | 0                                                        | 32.4            | 9.120                                      | 24.971                                        | 32.2                                                                  |
| Netarts | 2015 | 0.79                                                | 42.37                                             | 0.19                                    | 14.10                  | 233.5                                                    | 32.8            | 7.054                                      | 22.020                                        | 63.3                                                                  |
| Netarts | 2016 | 0.11                                                | 28.86                                             | 0.04                                    | 14.50                  | 102.2                                                    | 32.4            | 3.916                                      | 22.294                                        | 46.8                                                                  |
| Netarts | 2017 | 0.43                                                | 18.32                                             | 0.10                                    | 14.10                  | 0                                                        | 30.7            | 5.315                                      | 22.597                                        | 52.4                                                                  |

|         |      |       |       |      |       |       |       |        |        |      |
|---------|------|-------|-------|------|-------|-------|-------|--------|--------|------|
| Netarts | 2018 | 0.35  | 24.05 | 0.34 | 14.50 | 28.1  | 32.6  | 3.515  | 21.183 | 41.6 |
| Netarts | 2019 | 3.25  | 22.13 | 0.27 | 14.30 | 34.2  | 33.5  | 7.280  | 13.119 | 41.7 |
| Yaquina | 2006 | 24.40 | 22.90 | 0.35 | 11.88 | 116.5 | 32.17 | 9.853  | 18.755 | 78.6 |
| Yaquina | 2007 | 29.20 | 21.70 | 0.35 | 13.10 | 59.3  | 32.17 | 8.649  | 17.939 | 36.7 |
| Yaquina | 2008 | 65.80 | 16.80 | 0.35 | 11.10 | 0     | 32.17 | 8.293  | 20.365 | 55.1 |
| Yaquina | 2009 | 46.40 | 12.90 | 0.35 | 11.60 | 0     | 32.50 | 8.558  | 16.302 | 38.5 |
| Yaquina | 2010 | 49.40 | 15.70 | 0.35 | 11.70 | 17.6  | 31.00 | 13.911 | 20.416 | 46.8 |
| Yaquina | 2015 | 10.1  | 20.13 | 0.35 | 12.40 | 185.3 | 33.00 | 10.336 | 15.750 | 79.8 |
| Yaquina | 2016 | 29.26 | 15.25 | 0.16 | 12.40 | 376.2 | 32.17 | 11.583 | 18.342 | 67.5 |
| Yaquina | 2017 | 15.46 | 19.29 | 0.25 | 12.20 | 14.6  | 32.17 | 11.685 | 16.219 | 73.6 |
| Yaquina | 2018 | 37.43 | 11.50 | 0.45 | 12.40 | 0     | 32.17 | 10.193 | 16.805 | 62.4 |
| Yaquina | 2019 | 39.60 | 11.15 | 0.52 | 12.60 | 28.7  | 32.17 | 12.063 | 15.031 | 60.8 |
| Coos    | 2006 | 24.50 | 22.50 | 0.23 | 13.70 | 21.2  | 31.4  | 9.883  | 19.865 | 103  |
| Coos    | 2007 | 45.20 | 17.20 | 0.23 | 14.30 | 58.8  | 33.8  | 8.161  | 18.170 | 48.7 |
| Coos    | 2008 | 62.60 | 15.10 | 0.23 | 12.30 | 0     | 31.6  | 11.535 | 21.335 | 78.9 |
| Coos    | 2009 | 42.70 | 8.50  | 0.23 | 13.10 | 0     | 33    | 10.166 | 17.658 | 53.2 |
| Coos    | 2010 | 12.30 | 13.70 | 0.23 | 12.70 | 0     | 29.8  | 9.671  | 22.299 | 68.1 |
| Coos    | 2015 | 7.77  | 42.59 | 0.23 | 13.50 | 111.4 | 31.8  | 14.382 | 10.931 | 91.8 |
| Coos    | 2016 | 6.75  | 45.32 | 0.04 | 13.90 | 113.6 | 33    | 4.963  | 19.438 | 80.5 |
| Coos    | 2017 | 7.53  | 21.31 | 0.15 | 13.60 | 13.0  | 31.5  | 6.224  | 20.979 | 76.4 |
| Coos    | 2018 | 3.61  | 23.77 | 0.30 | 13.40 | 0     | 32.7  | 4.518  | 17.683 | 71.8 |
| Coos    | 2019 | 5.78  | 18.51 | 0.44 | 13.90 | 28.3  | 31.7  | 8.317  | 14.073 | 69.5 |

Table S3. Years, locations, and sources for the macrophyte (eelgrass and ulvoid macroalgae), epiphyte, and environmental data for the four US Pacific Northwest estuaries (Figure 1; Willapa Bay, WA, Netarts Bay, OR, Yaquina Bay, OR, and Coos Bay, OR) used in the analyses.

| Parameter(s)                                        | Years used            | Location(s), Latitude & Longitude                                                                                                               | Source/Contact                                                                                                          |
|-----------------------------------------------------|-----------------------|-------------------------------------------------------------------------------------------------------------------------------------------------|-------------------------------------------------------------------------------------------------------------------------|
| Macrophyte (eelgrass and ulvoid macroalgae) surveys | 2006-2010 & 2015-2019 | Willapa Bay (46.600 °N, 124.033 °W), Netarts Bay (45.416 °N, 123.936 °W), Yaquina Bay (44.619 °N, 124.029 °W), Coos Bay (43.347 °N, 124.317 °W) | This Study, Hessing-Lewis and Hacker 2013, and Hayduk et al. 2019                                                       |
| Epiphyte surveys                                    | 2016-2019             | Same as above.                                                                                                                                  | This Study                                                                                                              |
| Water temperature (Ocean)                           | 1979-2019             | Offshore Buoy near Cape Blanco (42.5890 °N, 130.4740 °W)                                                                                        | NANOOS, <a href="http://nvs.nanoos.org/Climatology">http://nvs.nanoos.org/Climatology</a><br>Asset ID: NDBC_46002_site  |
| Water temperature (Willapa Bay)                     | 1995-2019             | Toke Point, WA (46.7075 °N, 123.9669 °W)                                                                                                        | NANOOS, <a href="http://nvs.nanoos.org/Climatology">http://nvs.nanoos.org/Climatology</a><br>Asset ID: NOS_9440910_site |
| Water temperature & salinity (Willapa Bay)          | 2011-2019             | Tokeland, WA (46.7075 °N, 123.9669 °W)                                                                                                          | Pacific Shellfish Institute, Olympia, WA (contact: Andy Suhrbier)                                                       |
| Water temperature (Netarts Bay)                     | 2006-2019             | Garibaldi, OR (45.5545 °N, 123.9189 °W)                                                                                                         | NANOOS, <a href="http://nvs.nanoos.org/Climatology">http://nvs.nanoos.org/Climatology</a><br>Asset ID: NOS_9437540_site |
| Water temperature & salinity (Netarts Bay)          | 2014-2019             | Netarts Bay, OR (45.3949 °N, 123.9376 °W)                                                                                                       | Whiskey Creek Shellfish Hatchery, Netarts, OR (contact: Dr. Burke Hales)                                                |
| Water temperature (Yaquina Bay)                     | 1992-2019             | South Beach, OR (44.6248 °N, 124.0455 °W)                                                                                                       | NANOOS, <a href="http://nvs.nanoos.org/Climatology">http://nvs.nanoos.org/Climatology</a><br>Asset ID: NOS_9435380_site |
| Water temperature & salinity (Yaquina Bay)          | 2009-2015             | Yaquina Bay, OR (44.6252 °N, 124.0452 °W)                                                                                                       | US EPA Pacific Coastal Ecology Branch, Newport, OR (contact: T. Chris Mochon Collura)                                   |

|                                         |                       |                                                                                                                                                                                           |                                                                                                                                                                                                   |
|-----------------------------------------|-----------------------|-------------------------------------------------------------------------------------------------------------------------------------------------------------------------------------------|---------------------------------------------------------------------------------------------------------------------------------------------------------------------------------------------------|
| Water temperature (Coos Bay)            | 1993-2019             | Charleston, OR (43.3450 °N, 124.3220 °W)                                                                                                                                                  | NANOOS,<br><a href="http://nvs.nanoos.org/Climatology">http://nvs.nanoos.org/Climatology</a><br>Asset ID: NOS_9432780_site                                                                        |
| Water temperature & salinity (Coos Bay) | 2002-2019             | Charleston, OR (43.3377 °N, 124.3205 °W)                                                                                                                                                  | NOAA, Office of Ocean and Coastal Resource Management, CDMO, Baruch Marine Field Lab, University of South Carolina:<br><a href="http://cdmo.baruch.sc.edu">http://cdmo.baruch.sc.edu</a>          |
| Upwelling Index (Bakun)                 | 2006-2010 & 2015-2019 | 0.5° radius of each estuary mouth:<br><br>Willapa Bay (46.69 °N, 124.08 °W), Netarts Bay (45.44 °N, 123.96 °W),<br><br>Coos Bay (45.44 °N, 123.96 °W), Yaquina Bay (44.62 °N, 124.07 °W)  | Pacific Fisheries Environmental Laboratory (NOAA)<br><br><a href="https://coastwatch.pfeg.noaa.gov">https://coastwatch.pfeg.noaa.gov</a>                                                          |
| Offshore & alongshore ocean currents    | 2007-2010 & 2015-2019 | 0.6 ° radius of each estuary mouth:<br><br>Willapa Bay (46.69 °N, 124.08 °W), Netarts Bay (45.44 °N, 123.96 °W),<br><br>Coos Bay (45.44 °N, 123.96 °W), Yaquina Bay (44.62 °N, 124.07 °W) | CODAR dataset, M. Kosro, Oregon State University<br><br><a href="http://bragg.coas.oregonstate.edu">http://bragg.coas.oregonstate.edu</a>                                                         |
| Land cover                              | 2006 & 2010           | Coos Bay, Yaquina Bay, & Willapa Bay watersheds                                                                                                                                           | NOAA Coastal Change Analysis Program,<br><a href="https://coast.noaa.gov/ccapatlas">https://coast.noaa.gov/ccapatlas</a>                                                                          |
| Land cover (Netarts Bay)                | 2011                  | Netarts Bay watershed                                                                                                                                                                     | <a href="https://www.tbnep.org/reports-publications/netarts-bay-habitat-study-restoration-plan.pdf">https://www.tbnep.org/reports-publications/netarts-bay-habitat-study-restoration-plan.pdf</a> |
| Population density (by County)          | 2000 & 2011           | Pacific County, WA, Tillamook County, OR, Lincoln County, OR, Coos County, OR                                                                                                             | US Census Bureau,<br><a href="http://www.census.gov/quickfacts">www.census.gov/quickfacts</a>                                                                                                     |

Table S4. Average (standard error) of eelgrass abundance metrics (biomass, shoot density, and per shoot biomass), eelgrass epiphyte load, and macroalgae biomass in four US Pacific Northwest coast estuaries (Figure 1) for three periods: before (2006-2010), during (2015-2016), and after (2017-2019) the 2013-2016 northeast Pacific Ocean marine heat wave. Epiphyte load was not available across all estuaries and time periods for this study, but data are compiled from other sources (indicated by footnotes) for comparison. n/a = data not available.

| Estuary     | Period | Eelgrass biomass<br>(g dry wt 0.25m <sup>-2</sup> ) | Eelgrass shoot<br>density<br>(shoots 0.25m <sup>-2</sup> ) | Eelgrass per<br>shoot biomass<br>(g dry wt shoot <sup>-1</sup> ) | Epiphyte load<br>(g dry wt per g<br>eelgrass)         | Macroalgae biomass<br>(g dry wt 0.25m <sup>-2</sup> ) |
|-------------|--------|-----------------------------------------------------|------------------------------------------------------------|------------------------------------------------------------------|-------------------------------------------------------|-------------------------------------------------------|
| Willapa Bay | Before | 51.1 (1.35)                                         | 39.5 (1.05)                                                | 1.29 (0.06)                                                      | 0.025 (0.044) <sup>1</sup><br>0.03 (n/a) <sup>2</sup> | 2.94 (0.58)                                           |
|             | During | 31.5 (1.61)                                         | 40.2 (2.05)                                                | 1.01 (0.08)                                                      | 0.008 (0.003) <sup>3</sup>                            | 0.11 (0.06)                                           |
|             | After  | 20.9 (1.20)                                         | 26.8 (1.53)                                                | 0.66 (0.05)                                                      | 0.04 (0.005)                                          | 3.39 (0.88)                                           |
| Netarts Bay | Before | 50.7 (1.76)                                         | 89.4 (3.19)                                                | 0.58 (0.04)                                                      | 0.52 (n/a) <sup>4</sup>                               | 1.18 (0.30)                                           |
|             | During | 39.0 (1.61)                                         | 73.5 (1.86)                                                | 0.53 (0.02)                                                      | 0.04 (0.01) <sup>3</sup>                              | 0.62 (0.19)                                           |
|             | After  | 21.6 (0.90)                                         | 52.1 (2.18)                                                | 0.43 (0.04)                                                      | 0.24 (0.03)                                           | 1.35 (0.64)                                           |
| Yaquina Bay | Before | 17.9 (0.96)                                         | 23.1 (1.16)                                                | 0.85 (0.06)                                                      | 1.42 (n/a) <sup>5</sup>                               | 42.3 (2.30)                                           |
|             | During | 19.2 (1.28)                                         | 8.99 (1.28)                                                | 0.88 (0.04)                                                      | 0.16 (0.02) <sup>3</sup>                              | 13.9 (1.11)                                           |

|          |        |             |             |             |                            |             |
|----------|--------|-------------|-------------|-------------|----------------------------|-------------|
|          | After  | 14.3 (1.13) | 23.3 (1.83) | 0.66 (0.04) | 0.39 (0.04)                | 29.9 (2.68) |
| Coos Bay | Before | 15.4 (0.98) | 29.5 (1.76) | 0.55 (0.03) | 0.022 (0.015) <sup>1</sup> | 37.4 (2.43) |
|          | During | 43.1 (2.40) | 22.4 (3.60) | 1.22 (0.05) | 0.04 (0.01) <sup>3</sup>   | 7.57 (0.42) |
|          | After  | 23.2 (1.38) | 41.6 (2.48) | 0.51 (0.03) | 0.27 (0.03)                | 7.12 (0.76) |

<sup>1</sup>July – August 1998-2001 (Thom et al. 2003)

<sup>2</sup>June 2012 (Ruesink 2016)

<sup>3</sup>Early August 2016 only (this study)

<sup>4</sup>April 1980 – May 1981 (Kentula 1982)

<sup>5</sup>August 2000 – November 2004 (Nelson 2018)



Table S5. Summary of the partial least squares regression (PLSR) analysis between the response block (Y), including two response variables, and the explanatory block (X), including 8 explanatory variables (see Appendix A: Tables S1 and S2 for variable abbreviations) for four US Pacific Northwest estuaries (Figure 1) from before the marine heat wave (2006-2010). Load indicates the sign of the relationship of each variable with Axis 1 and weight<sup>2</sup> indicates the proportion of Axis 1 explained by each explanatory variable. Variable importance (VIP) measures the explanatory power of each variable for the Y block. VIP > 1 are considered most important (indicated with asterisk and bold text). Cross-correlation is the coefficient for the correlation between each variable and the opposing block. Correlation is the coefficient for the correlation between each variable and its own block. n/a = metric not applicable to variable.

| PLSR Component | Variable                     | Load | Weight <sup>2</sup> | VIP   | Cross-Correlation | Correlation |
|----------------|------------------------------|------|---------------------|-------|-------------------|-------------|
| X              | <b>Tidal Exchange Volume</b> | +    | 0.13                | 1.04* | 0.53              | 0.93        |
|                | <b>Freshwater Flow</b>       | –    | 0.19                | 1.22* | -0.62             | -0.66       |
|                | <b>Water Temperature</b>     | +    | 0.15                | 1.10* | 0.56              | 0.91        |
|                | <b>Offshore Current</b>      | –    | 0.28                | 1.50* | -0.77             | -0.90       |
|                | Estuarine Heat Wave          | +    | 0.00                | 0.12  | 0.06              | 0.10        |
|                | Salinity                     | –    | 0.10                | 0.91  | -0.46             | -0.78       |
|                | Upwelling Index              | –    | 0.12                | 0.98  | -0.50             | -0.67       |
|                | Alongshore Current           | –    | 0.02                | 0.42  | -0.21             | -0.74       |
| Y              | Eelgrass                     | +    | n/a                 | n/a   | 0.69              | 0.97        |
|                | Macroalgae                   | –    | n/a                 | n/a   | -0.68             | -0.97       |

Table S6. Summary of the partial least squares regression (PLSR) analysis between the response block (Y), including three response variables, and the explanatory block (X), including 8 explanatory variables (see Appendix A: Table S1 and Table S2 for variable abbreviations) for four US Pacific Northwest estuaries (Figure 1) from during and after the marine heat wave (2015-2019). Load indicates the sign of the relationship of each variable with Axis 1 and weight<sup>2</sup> indicates the proportion of Axis 1 explained by each explanatory variable. Variable importance (VIP) measures the explanatory power of each variable for the Y block. VIP > 1 are considered most important (indicated with asterisk and bold text). Cross-correlation is the coefficient for the correlation between each variable and the opposing block. Correlation is the coefficient for the correlation between each variable and its own block. n/a = metric not applicable to variable.

| PLSR Component | Variable                 | Load | Weight <sup>2</sup> | VIP   | Cross-Correlation | Correlation |
|----------------|--------------------------|------|---------------------|-------|-------------------|-------------|
| X              | Tidal Exchange Volume    | +    | 0.10                | 0.90  | 0.48              | 0.79        |
|                | <b>Freshwater Flow</b>   | –    | 0.27                | 1.46* | -0.78             | -0.83       |
|                | <b>Water Temperature</b> | +    | 0.24                | 1.38* | 0.74              | 0.97        |
|                | <b>Offshore Current</b>  | –    | 0.15                | 1.08* | -0.57             | -0.83       |
|                | Estuarine Heat Wave      | –    | 0.00                | 0.11  | 0.06              | -0.29       |
|                | Salinity                 | –    | 0.09                | 0.87  | -0.46             | -0.73       |
|                | Upwelling Index          | –    | 0.10                | 0.89  | -0.47             | -0.83       |
|                | Alongshore Current       | +    | 0.06                | 0.66  | 0.35              | 0.08        |
| Y              | Eelgrass                 | +    | n/a                 | n/a   | 0.25              | 0.68        |
|                | Macroalgae               | –    | n/a                 | n/a   | -0.71             | -0.87       |
|                | Epiphytes                | –    | n/a                 | n/a   | -0.71             | -0.86       |

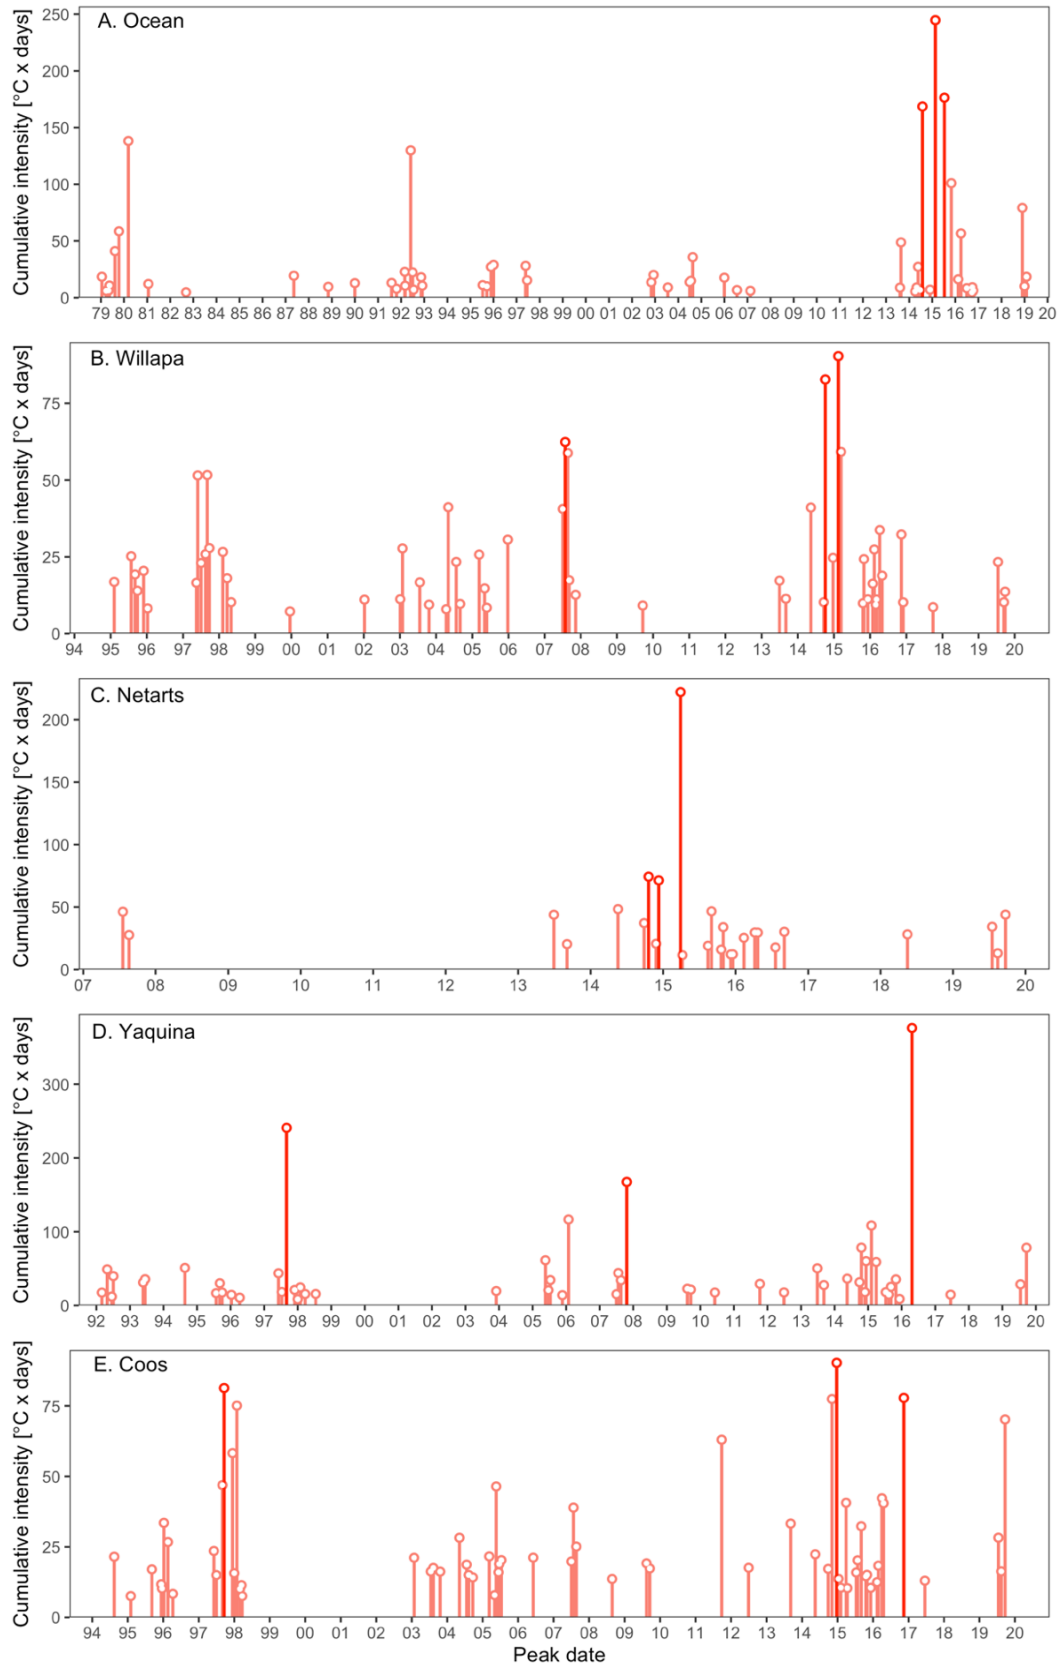

**Fig. S1** Cumulative intensity ( $^{\circ}\text{C} \times \text{days}$ ) of detected heatwave events (centered on peak date) in the northeast Pacific Ocean (A) and four US Pacific Northwest estuaries (Figure 1): Willapa Bay, WA (B), Netarts Bay, OR (C), Yaquina Bay, OR (D), and Coos Bay, OR (E) during the full timeseries of the available water temperature data for each site. For clarity, the x and y axes differ among plots. The top three events (highest cumulative intensity) in each location are emphasized with a red line. Graphs were produced using definitions and functions contained in the ‘heatwaveR’ R package (Schlegel and Smit 2018).

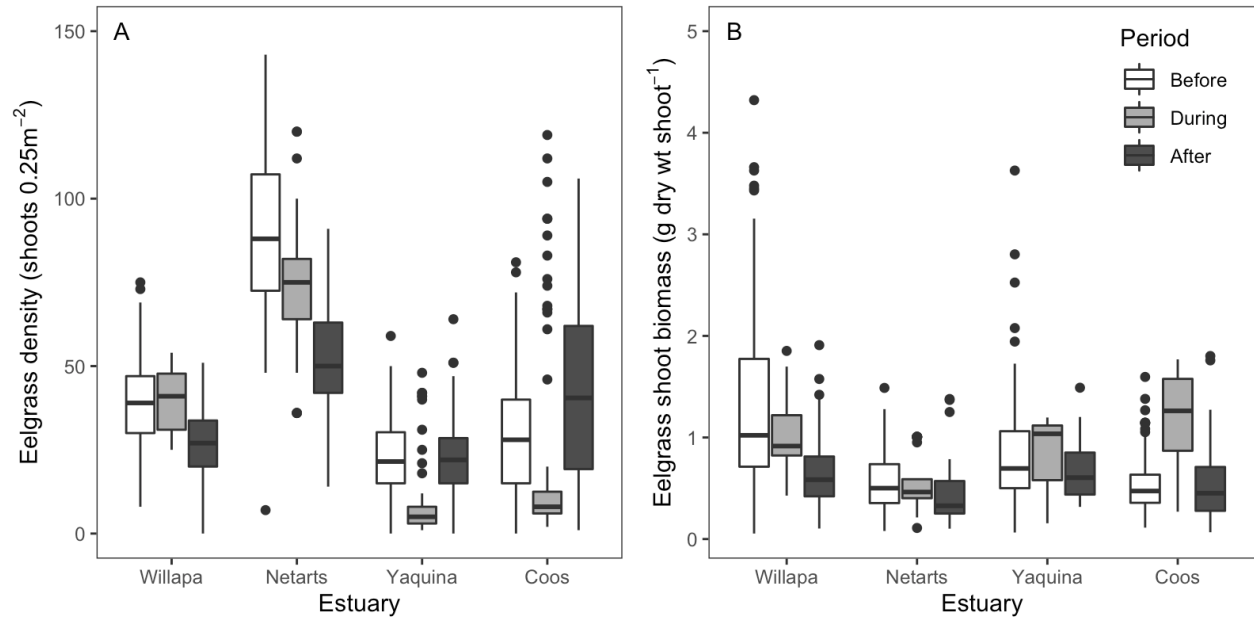

**Fig. S2** Shoot density (shoots 0.25 m<sup>-2</sup>) (A) and per shoot biomass (grams dry weight shoot<sup>-1</sup>) (B) of eelgrass beds in four US Pacific Northwest estuaries (Figure 1) before (2006-2010, white fill), during (2015-2016, light gray fill), and after (2017-2019, dark gray fill) the NE Pacific Ocean marine heat wave (2013-2016). Boxes (with median centerline) encompass the interquartile range (25th-75th percentile) of the data for each estuary and period. Whiskers extend to the most extreme data point that is no more than 1.5 times the length of the box and values falling beyond that range are shown as points. For clarity, ANOVA comparisons are not shown but are discussed in text.

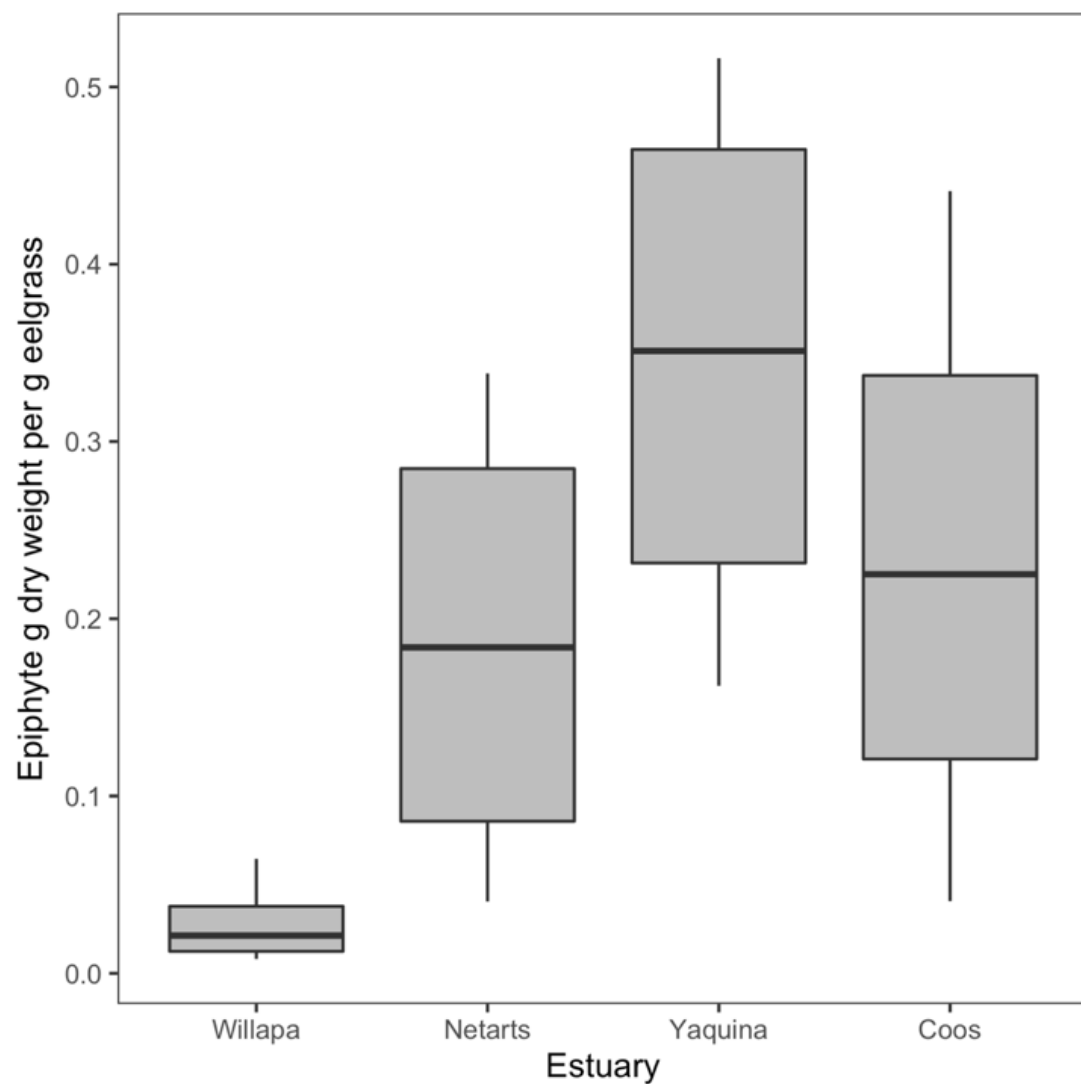

**Fig. S3** Epiphyte load (g dry wt epiphyte per g dry wt eelgrass) across four US Pacific Northwest coast estuaries (Figure 1) between 2016-2019. Boxes (with median centerline) encompass the interquartile range (25th-75th percentile) of the data for each. Whiskers extend to the most extreme data point which is no more than 1.5 times the length of the box.

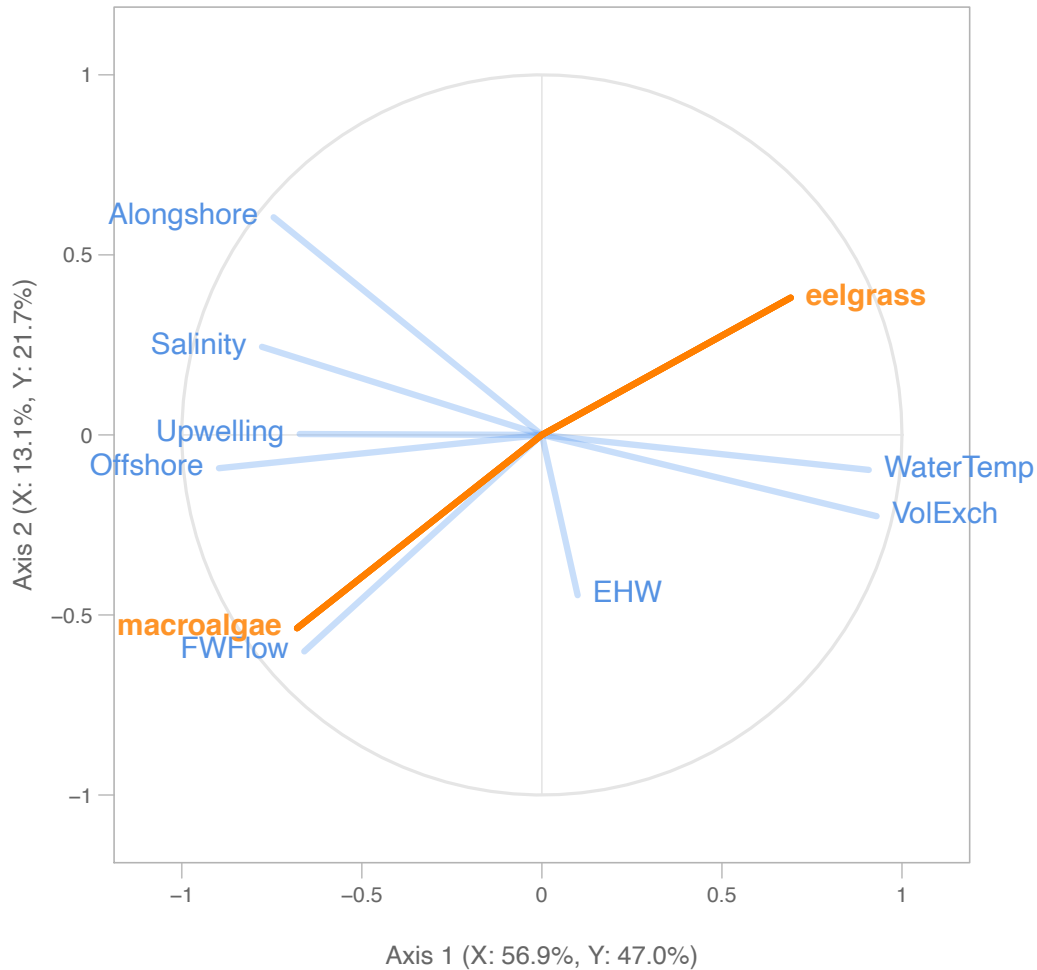

**Fig. S4** Partial least squares correlation radar plot of 8 explanatory environmental variables (blue; see Appendix A: Table S1 and Table S2 for abbreviations) and response macrophyte variables (orange; Figures 2 and 3), including eelgrass biomass (“eelgrass”) and ulvoid macroalgae biomass (“macroalgae”), in four US Pacific Northwest estuaries (Figure 1) before the marine heat wave (2006-2010). Eelgrass and macroalgae biomass were log-transformed for the analysis. Epiphyte load data was not available prior to 2016. Each segment represents a model variable. Longer segments (closer to the circle perimeter) indicate that the variable is better represented. Segments close together are highly and positively correlated variables. Segments in opposite directions are negatively correlated. Orthogonal segments indicate no correlation.

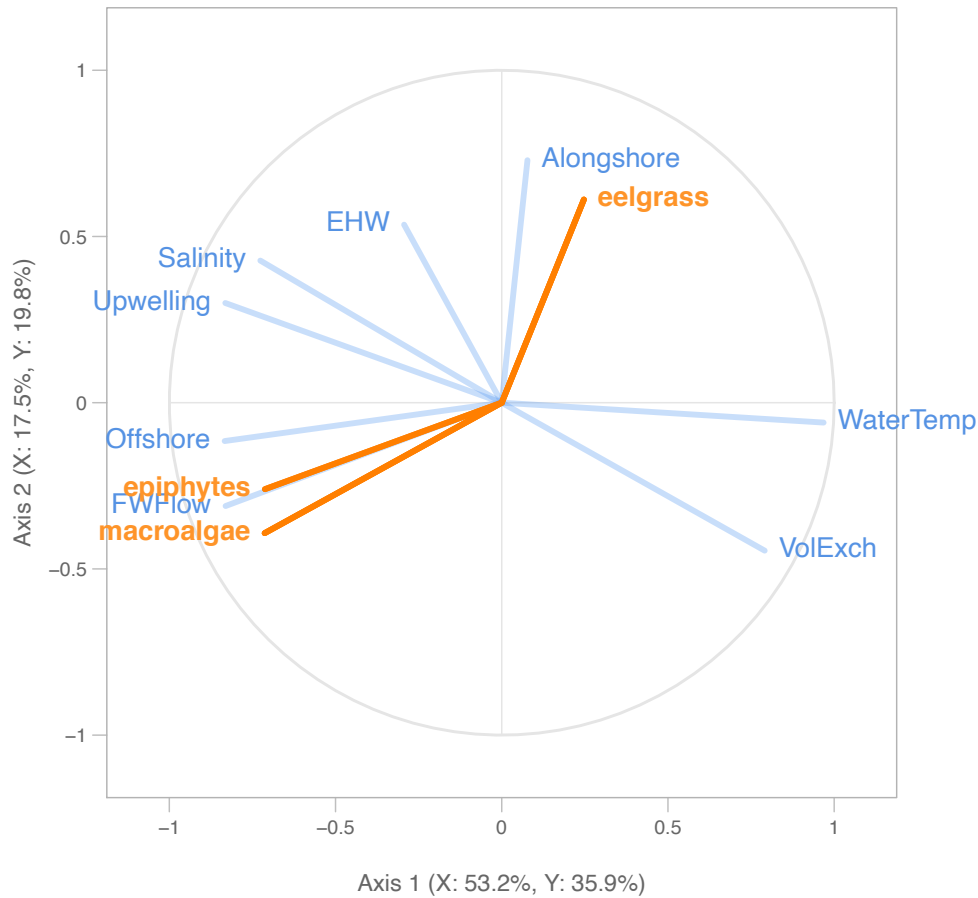

**Fig. S5** Partial least squares correlation radar plot of 8 explanatory environmental variables (blue; see Appendix A: Table S1 and Table S2 for abbreviations) and response macrophyte variables (orange; Figures 2 and 3), including eelgrass biomass (“eelgrass”), ulvoid macroalgae biomass (“macroalgae”), and epiphyte load (“epiphytes”), in four US Pacific Northwest estuaries (Figure 1) during and after the marine heat wave (2015-2019). Eelgrass and macroalgae biomass were log-transformed for the analysis, epiphyte load was not transformed. Each segment represents a model variable. Longer segments (closer to the circle perimeter) indicate that the variable is better represented. Segments close together are highly and positively correlated variables. Segments in opposite directions are negatively correlated. Orthogonal segments indicate no correlation.



## REFERENCES

- Hayduk, J.L., S.D. Hacker, J.S. Henderson, and F. Tomas. 2019. Evidence for regional-scale controls on eelgrass (*Zostera marina*) and mesograzer community structure in upwelling-influenced estuaries. *Limnology and Oceanography* 64: 1120–1134.  
<https://doi.org/10.1002/lno.11102>.
- Hessing-Lewis, M.L., and S.D. Hacker. 2013. Upwelling-influence, macroalgal blooms, and seagrass production; temporal trends from latitudinal and local scales in northeast Pacific estuaries. *Limnology and Oceanography* 58: 1103–1112.  
<https://doi.org/10.4319/lo.2013.58.3.1103>.
- Kentula, M.E. 1982. Production dynamics of a *Zostera marina* L. bed in Netarts Bay, Oregon. PhD Dissertation, Corvallis, Oregon, USA: Oregon State University.
- Lee, H., and C.A. Brown. 2009. *Classification of regional patterns of environmental drivers and benthic habitats in Pacific Northwest estuaries*. EPA/600/R-09/140. U.S. EPA, Office of Research and Development, National Health and Environmental Effects Research Laboratory, Western Ecology Division.
- Nelson, W.G. 2018. An evaluation of factors controlling the abundance of epiphytes on *Zostera marina* along an estuarine gradient in Yaquina Bay, Oregon, USA. *Aquatic Botany* 148: 53–63. <https://doi.org/10.1016/j.aquabot.2018.04.010>.
- Ruesink, J.L. 2016. Epiphyte load and seagrass performance are decoupled in an estuary with low eutrophication risk. *Journal of Experimental Marine Biology and Ecology* 481: 1–8.  
<https://doi.org/10.1016/j.jembe.2016.03.022>.

Schlegel, R.W., and A.J. Smit. 2018. heatwaveR: A central algorithm for the detection of heatwaves and cold-spells. *Journal of Open Source Software* 3: 821.

<https://doi.org/10.21105/joss.00821>.

Thom, R.M., A.B. Borde, S. Rumrill, D.L. Woodruff, G.D. Williams, J.A. Southard, and S.L.

Sargeant. 2003. Factors influencing spatial and annual variability in eelgrass (*Zostera marina* L.) meadows in Willapa Bay, Washington, and Coos Bay, Oregon, estuaries. *Estuaries* 26:

1117–1129. <https://doi.org/10.1007/BF02803368>.
